# Supplementary material for: Self-supporting and bifunctional Cu-based electrocatalysts with porous structures as superior working electrodes for alkaline water splitting
Source: Royal Society of Chemistry journal article supplement (doi:10.1039/d2ce01677j), 2023-01-01
Supplement: d2ce01677j1.pdf [file d2ce01677j1.pdf]

## Supplementary Information

### Self-supporting and bifunctional Cu-based electrocatalysts with porous structures as superior working electrode for alkaline water splitting

Xiaomei Xu<sup>a</sup>, Kefang Yang<sup>a</sup>, Jiazi She<sup>a</sup>, Yanshui Zhai<sup>a</sup>, Meihua Zhou<sup>a</sup>, Ruihong Deng<sup>a</sup>,  
Zhimei Li<sup>a, \*</sup>, Hu Cai<sup>a, \*</sup>.

<sup>a</sup>School of Chemistry and Chemical Engineering, Nanchang University, 999 Xuefu Avenue, Nanchang 330031, China.

**\* Corresponding author**

E-mail: lizhimei@ncu.edu.cn (Zhimei Li)

E-mail: caihu@ncu.edu.cn (Hu Cai)

**Materials:** Sodium hydroxide, Potassium hydroxide, Anhydrous ethanol, Sodium chloride, Sodium sulfate, phenolphthalein, Methyl red were provided by Xilong Scientific Co., Ltd. Carbon disulfide were purchased by Shanghai Maclean Biochemical Technology Co., ltd.

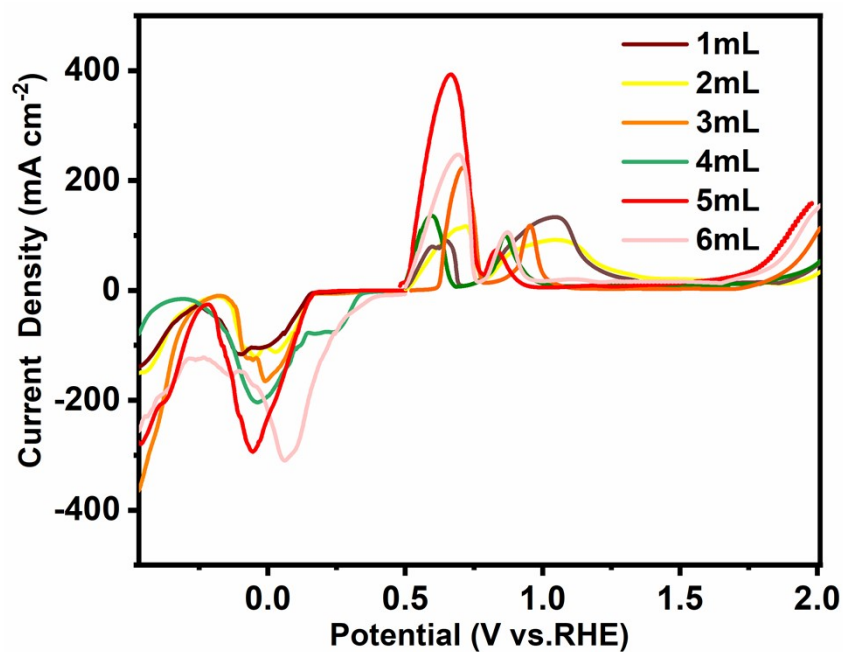

**Fig.S1.** Comparison of catalytic activities with different amount of CS<sub>2</sub>.

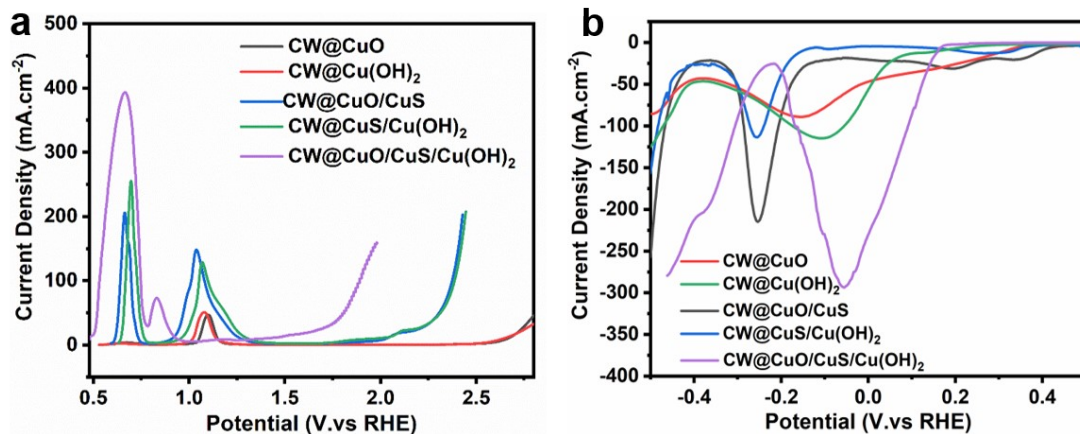

Fig. S2. (a, b) LSV of different samples.

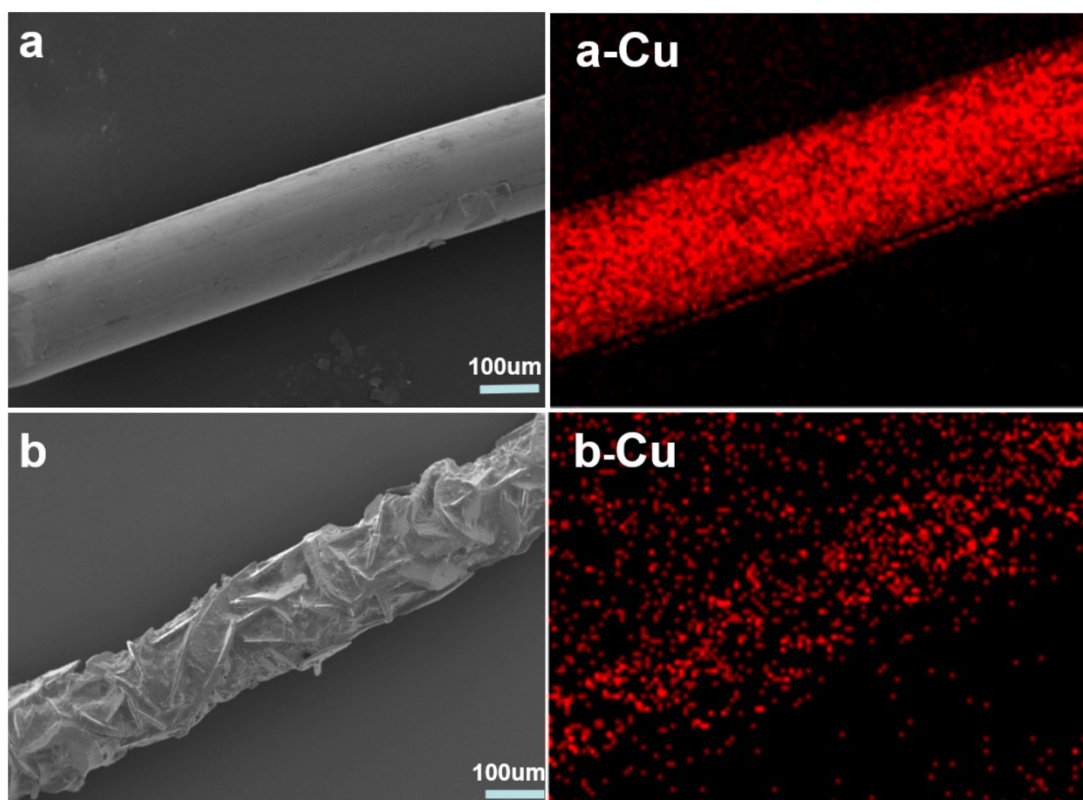

**Fig. S3.** The surface morphology SEM images and elements distributions of the original CWs(a) and etched CWs (b).

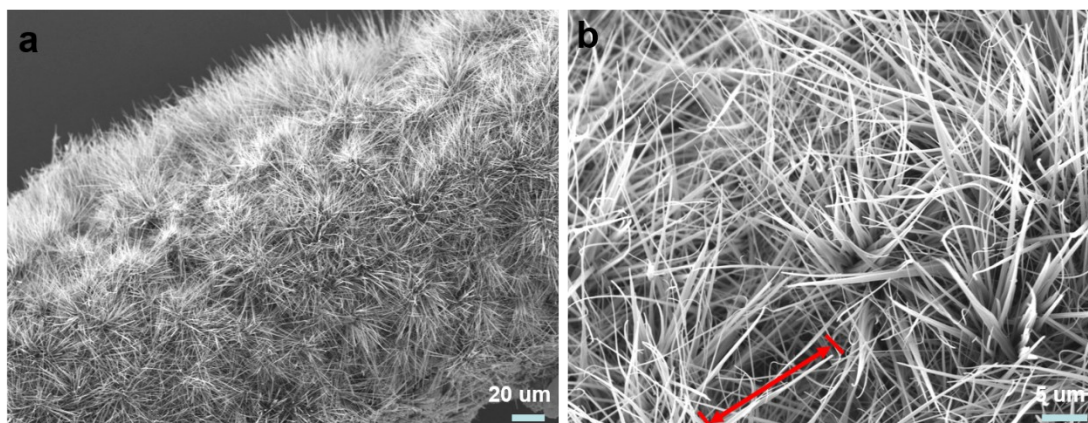

**Fig. S4.** Morphology characterization of CW@Cu<sup>II</sup>O/Cu (OH)<sub>2</sub> Nps electrode (a) and (b).

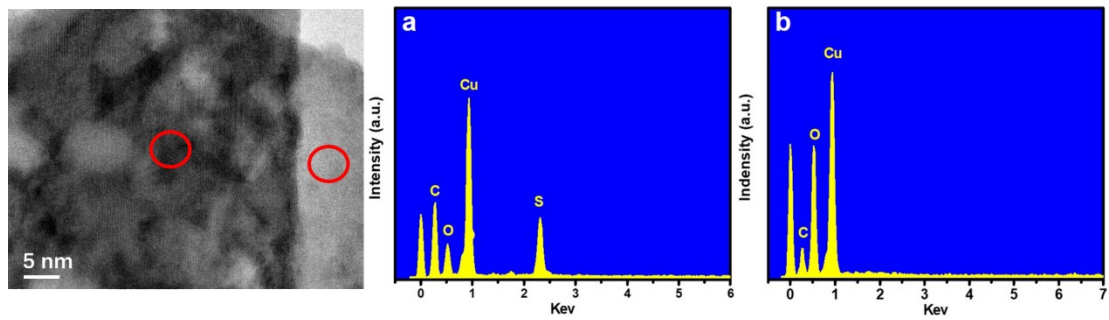

**Fig. S5.** TEM images of CW@Cu<sup>II</sup>O/Cu<sup>I</sup>S/Cu (OH)<sub>2</sub> Nps electrode and EDS spectra of Cu<sup>I</sup>S (a) and Cu<sup>II</sup>O/Cu (OH)<sub>2</sub> Nps (b).

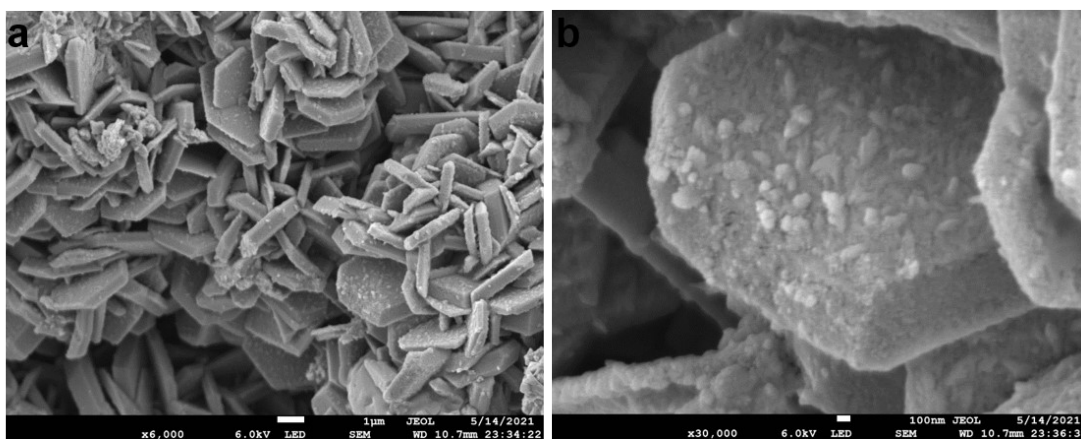

**Fig. S6.** (a, b) The surface morphology of the working electrode after oxidation and reduction reaction at different magnification.

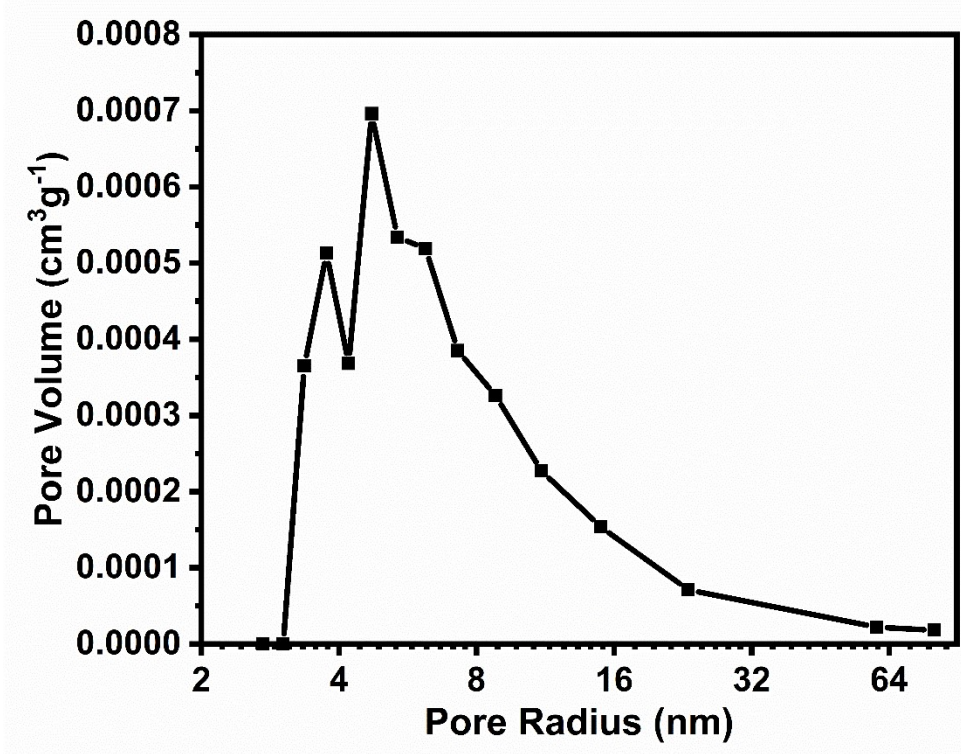

Fig. S7. Pore size distribution for CW@ Cu<sup>I</sup>O /Cu (OH)<sub>2</sub> NPs sample.



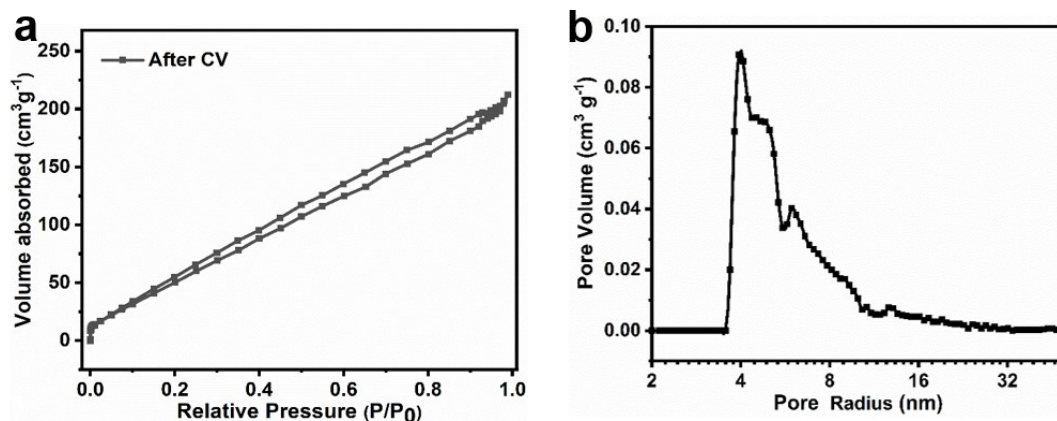

**Fig. S8** (a) N<sub>2</sub> adsorption-desorption analysis results after oxidation and reduction experiment of the Cu<sup>II</sup>O/Cu<sup>I</sup>S/Cu(OH)<sub>2</sub> Nps; (b) Pore size distribution for samples after oxidation and reduction experiment.

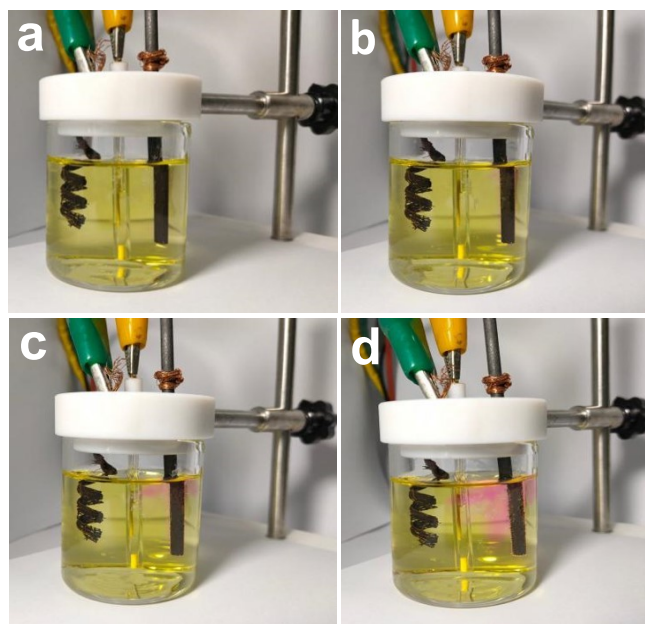

**Fig. S9.** The result of the color-change-process around the carbon rod when methyl orange is added at +0.06 V in 1M sodium sulfate solution.

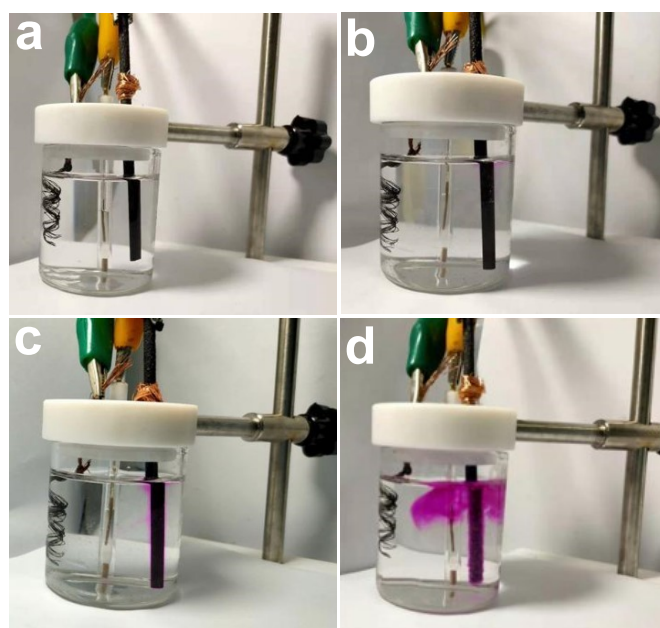

**Fig. S10.** The result of the color-change-process around the carbon rod when methyl orange is added at  $-0.06\text{V}$  in  $1\text{M}$  sodium sulfate solution.

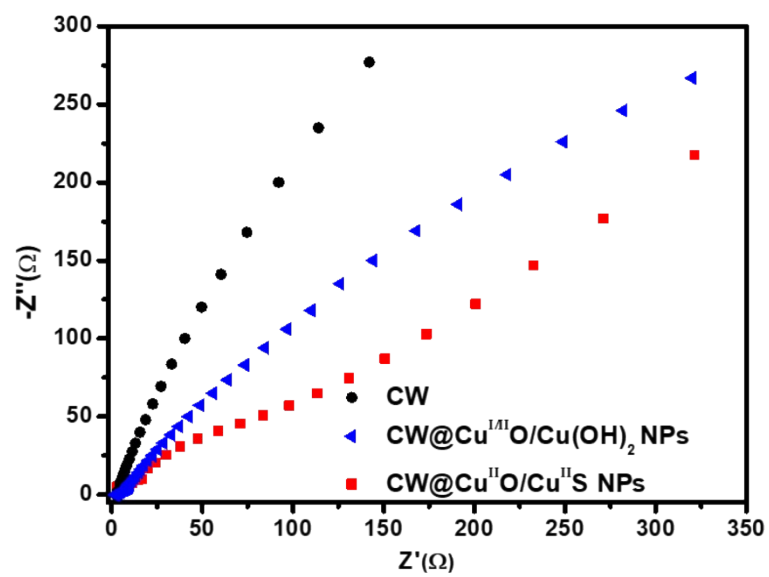

**Fig. S11.** Nyquist plots of samples indicated in 1M KOH.

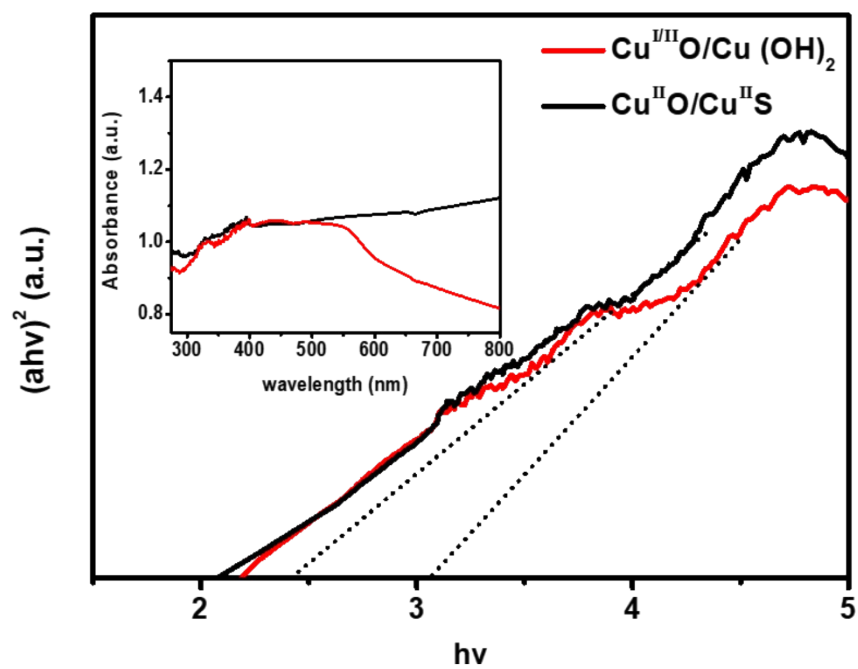

**Fig. S12.** Tauc plot of  $\text{Cu}^{\text{II}}\text{O}/\text{Cu}^{\text{II}}\text{S}/\text{Cu}(\text{OH})_2$  and  $\text{Cu}^{\text{I/II}}\text{O}/\text{Cu}(\text{OH})_2$  samples. The inset is UV-Vis diffuse reflectance spectra (DRS).

**Table S1.** Electrocatalytic performance data of different samples.

| <b>sample</b>                        | <b>CW@CuO</b>   | <b>CW@Cu(OH)<sub>2</sub></b> | <b>CW@CuO/CuS</b> | <b>CW@CuS/Cu (OH)<sub>2</sub></b> | <b>CW@CuO/CuS/Cu (OH)<sub>2</sub></b> |
|--------------------------------------|-----------------|------------------------------|-------------------|-----------------------------------|---------------------------------------|
| <b>Potential (V vs. RHE) for OER</b> | <b>2.64</b>     | <b>2.64</b>                  | <b>1.94</b>       | <b>1.94</b>                       | <b>1.39</b>                           |
| <b><math>\eta_{10}</math> (mV)</b>   | <b>410</b>      | <b>410</b>                   | <b>610</b>        | <b>610</b>                        | <b>160</b>                            |
| <b>Potential(V vs. RHE) for HER</b>  | <b>&gt;-0.5</b> | <b>-0.47</b>                 | <b>-0.46</b>      | <b>-0.48</b>                      | <b>-0.267</b>                         |
| <b><math>\eta_{100}</math> (mV)</b>  | <b>&gt;500</b>  | <b>470</b>                   | <b>460</b>        | <b>480</b>                        | <b>267</b>                            |

**Table S2.** Element content results for samples.

| <b>Samples</b>                                                      | <b>S</b> | <b>Cu</b> | <b>O</b> |
|---------------------------------------------------------------------|----------|-----------|----------|
| CW @ Cu <sup>II</sup> O/Cu <sup>II</sup> S/Cu (OH) <sub>2</sub> NPs | 22.57    | 60.26     | 17.17    |
| CW @Cu <sup>I/II</sup> O/Cu (OH) <sub>2</sub> NPs                   | 0.00     | 59.17     | 40.83    |

**Table S3.** BET surface area of samples.

| Samples                                                            | Specific Surface Area (m <sup>2</sup> /g) |
|--------------------------------------------------------------------|-------------------------------------------|
| CW@ Cu <sup>II</sup> O/Cu <sup>II</sup> S/Cu (OH) <sub>2</sub> Nps | 5.56                                      |
| CW @Cu <sup>I/II</sup> O/Cu (OH) <sub>2</sub> Nps                  | 27.73                                     |



**Table S4.** Mechanism speculation.

| Potential (V vs. RHE)   | Gas                     | Transformation                                                                                             | Half Reaction (1 M KOH)                                                                                                          |
|-------------------------|-------------------------|------------------------------------------------------------------------------------------------------------|----------------------------------------------------------------------------------------------------------------------------------|
| < -0.27 V               | O <sub>2</sub>          | /                                                                                                          | (+) 4OH <sup>-</sup> == 2H <sub>2</sub> O+O <sub>2</sub> ↑+ 4e <sup>-</sup>                                                      |
|                         | H <sub>2</sub>          | /                                                                                                          | (-) 2H <sub>2</sub> O + 2 e <sup>-</sup> = 2OH <sup>-</sup> +H <sub>2</sub> ↑                                                    |
|                         | Total reaction equation |                                                                                                            | 2H <sub>2</sub> O = 2 H <sub>2</sub> ↑+ O <sub>2</sub> ↑                                                                         |
| 0.48 V ~ -0.27 V        |                         | Cu <sup>II</sup> S→Cu <sup>I</sup> S                                                                       | (-) CuS + H <sub>2</sub> O +2CuO+ Cu (OH) <sub>2</sub> +4 e <sup>-</sup> = Cu <sub>2</sub> S +Cu <sub>2</sub> O+4OH <sup>-</sup> |
|                         |                         | Cu <sup>II</sup> O/ Cu (OH) <sub>2</sub> →Cu <sup>I</sup> O                                                |                                                                                                                                  |
|                         | O <sub>2</sub>          | /                                                                                                          | (+) 4OH <sup>-</sup> == 2H <sub>2</sub> O+O <sub>2</sub> ↑+ 4 e <sup>-</sup>                                                     |
| Total reaction equation |                         | CuS +2CuO+ Cu (OH) <sub>2</sub> = Cu <sub>2</sub> S +Cu <sub>2</sub> O+ O <sub>2</sub> ↑ +H <sub>2</sub> O |                                                                                                                                  |
| 0.51 V ~0.93V           |                         | Cu <sup>I</sup> S→Cu <sup>II</sup> S                                                                       | (+) Cu <sub>2</sub> S+Cu <sub>2</sub> O+4OH <sup>-</sup> =                                                                       |
|                         |                         | Cu <sup>I</sup> O→ Cu <sup>II</sup> O                                                                      | CuS+2CuO+Cu (OH) <sub>2</sub> +H <sub>2</sub> O +4e <sup>-</sup>                                                                 |
|                         |                         | /Cu (OH) <sub>2</sub>                                                                                      |                                                                                                                                  |
| Total reaction equation |                         | Cu <sub>2</sub> S+Cu <sub>2</sub> O+3H <sub>2</sub> O=CuS+ 2CuO + Cu (OH) <sub>2</sub> +2H <sub>2</sub> ↑  |                                                                                                                                  |
| >1.48V                  | O <sub>2</sub>          | /                                                                                                          | (+) 4OH <sup>-</sup> == 2H <sub>2</sub> O+O <sub>2</sub> ↑+ 4 e <sup>-</sup>                                                     |
|                         | H <sub>2</sub>          | /                                                                                                          | (-) 2H <sub>2</sub> O + 2 e <sup>-</sup> = 2OH <sup>-</sup> +H <sub>2</sub> ↑                                                    |
|                         | Total reaction equation |                                                                                                            | 2H <sub>2</sub> O = 2 H <sub>2</sub> ↑+ O <sub>2</sub> ↑                                                                         |

**Table S5.** Gas chromatogram of air in the environment (O: N=1:3).

|          | <b>time</b>  | <b>peak area</b> | <b>gas</b>           |
|----------|--------------|------------------|----------------------|
| <b>1</b> | <b>0.71</b>  | <b>573.3</b>     | <b>O<sub>2</sub></b> |
| <b>2</b> | <b>0.752</b> | <b>1862.2</b>    | <b>N<sub>2</sub></b> |

**Table S6.** Gas chromatogram of oxygen.

|          | <b>time</b>  | <b>peak area</b> | <b>gas</b>           |
|----------|--------------|------------------|----------------------|
| <b>1</b> | <b>0.722</b> | <b>3796.9</b>    | <b>O<sub>2</sub></b> |
| <b>2</b> | <b>0.77</b>  | <b>86.2</b>      | <b>N<sub>2</sub></b> |

**Table S7.** Gas chromatogram of hydrogen.

|          | <b>time</b> | <b>peak area</b> | <b>gas</b>           |
|----------|-------------|------------------|----------------------|
| <b>1</b> | <b>0.69</b> | <b>3587.5</b>    | <b>H<sub>2</sub></b> |
| <b>2</b> | <b>0.73</b> | <b>119.1</b>     | <b>O<sub>2</sub></b> |
| <b>3</b> | <b>0.78</b> | <b>301.4</b>     | <b>N<sub>2</sub></b> |

**Table S8.** Comparison of HER and OER activities with different sulfur-copper compounds in 1M KOH

| Electrocatalyst                                   | Current Density<br>(mA.cm <sup>-2</sup> ) | $\eta$ for OER<br>(mV) | Tafel slop<br>(mV.dec <sup>-1</sup> ) | Current Density<br>(mA.cm <sup>-2</sup> ) | $\eta$ for HER<br>(mV) | Tafel slop<br>(mV.dec <sup>-1</sup> ) | Ref.                                                               |
|---------------------------------------------------|-------------------------------------------|------------------------|---------------------------------------|-------------------------------------------|------------------------|---------------------------------------|--------------------------------------------------------------------|
| Cu <sub>2</sub> S NRs @CoS                        | 50                                        | 275                    | 54                                    | 50                                        | 235                    | 121                                   | <i>Electrochimica Acta.</i> , 2019, <b>296</b> , 1035.             |
| CoO@Cu <sub>2</sub> S                             | 10                                        | 277                    | 62                                    | /                                         | /                      | /                                     | <i>Appl. Surf. Sci.</i> , 2021, <b>555</b> , 149441.               |
| CuS/SnS <sub>2</sub> /rGO                         | 100                                       | 264                    | 47                                    | /                                         | /                      | /                                     | <i>Dalton Trans.</i> , 2021, <b>50</b> , 5530-5539                 |
| Co <sub>3</sub> S <sub>4</sub> /CuS               | 10                                        | 220                    | 90.78                                 | 10                                        | 136                    | 136.3                                 | <i>Mater Res Lett.</i> , 2022, <b>10</b> , 2095235.                |
| @CoNi-LDH                                         |                                           |                        |                                       |                                           |                        |                                       |                                                                    |
| Ni-CuS                                            | 10                                        | 390                    | 96.8                                  |                                           |                        |                                       | <i>Catal. Sci. Technol.</i> , 2019, <b>9</b> , 406-417.            |
| Co <sub>9</sub> S <sub>8</sub> /Cu <sub>2</sub> S | 10                                        | 195                    | 143.5                                 | 10                                        | 165                    | 80.2                                  | <i>ACS Appl. Mater. Interfaces.</i> , 2021, <b>13</b> , 9865–9874. |
| Co <sub>9</sub> S <sub>8</sub> /Cu <sub>2</sub> S | 10                                        | 220                    | 372                                   | 90.78                                     | 136                    | 126.3                                 | <i>J. Energ. Chem.</i> , 2019, <b>39</b> , 61-67.                  |
| CoS <sub>2</sub> /CuS                             | 10                                        | /                      | /                                     | 10                                        | 85                     | 52                                    | <i>ACS Sustainable Chem. Eng.</i> 2019, <b>7</b> , 14016–14022.    |
| CuS–Ni <sub>3</sub> S <sub>2</sub>                | 100                                       | 377                    | 142                                   | /                                         | /                      | /                                     | <i>Inorg. Chem. Front.</i> , 2019, <b>6</b> , 293-302.             |
| <b>This work</b>                                  | <b>10</b>                                 | <b>160</b>             | <b>34</b>                             | <b>100</b>                                | <b>230</b>             | <b>119</b>                            | <b>Our work</b>                                                    |
